# Supplementary material for: Heterocyclic quinol-type fluorophores. Synthesis of novel imidazoanthraquinol derivatives and their photophysical properties in benzene and in the crystalline state
Source: Royal Society of Chemistry journal article supplement (doi:10.1039/b410311d), 2005-01-01
Supplement: b410311d.pdf [file b410311d.pdf]

## Supplementary data

**Table S1** Crystal data and structure refinement parameter for the quinol derivatives **2a**, **3a**, **6**, and **7**.

| Compound                                                           | <b>2a</b>                                                     | <b>3a</b>                                                     | <b>6</b>                                                      | <b>7</b>                                                      |
|--------------------------------------------------------------------|---------------------------------------------------------------|---------------------------------------------------------------|---------------------------------------------------------------|---------------------------------------------------------------|
| Molecular formula                                                  | C <sub>26</sub> H <sub>25</sub> N <sub>3</sub> O <sub>2</sub> | C <sub>26</sub> H <sub>25</sub> N <sub>3</sub> O <sub>2</sub> | C <sub>30</sub> H <sub>33</sub> N <sub>3</sub> O <sub>2</sub> | C <sub>30</sub> H <sub>33</sub> N <sub>3</sub> O <sub>2</sub> |
| Formula weight                                                     | 411.50                                                        | 411.50                                                        | 467.61                                                        | 467.61                                                        |
| Number of reflection used for unit cell determination (2θ range/°) | 25 (23.8-29.9)                                                | 25 (22.7-23.8)                                                | 25 (28.9-29.9)                                                | 25 (23.0-24.5)                                                |
| Crystal System                                                     | monoclinic                                                    | orthorhombic                                                  | monoclinic                                                    | monoclinic                                                    |
| Space group                                                        | P2 <sub>1</sub> /c                                            | Pna2 <sub>1</sub>                                             | P2 <sub>1</sub> /c                                            | P2 <sub>1</sub> /n                                            |
| a/Å                                                                | 11.111(2)                                                     | 13.405(6)                                                     | 16.130(3)                                                     | 12.007(3)                                                     |
| b/Å                                                                | 16.954(2)                                                     | 10.911(2)                                                     | 8.793(3)                                                      | 13.152(4)                                                     |
| c/Å                                                                | 12.318(2)                                                     | 14.405(3)                                                     | 18.260(3)                                                     | 16.196(5)                                                     |
| α/°                                                                |                                                               |                                                               |                                                               |                                                               |
| β/°                                                                | 113.97(1)                                                     |                                                               | 96.12(1)                                                      | 102.99(2)                                                     |
| γ/°                                                                |                                                               |                                                               |                                                               |                                                               |
| V/Å <sup>3</sup>                                                   | 2120.3(3)                                                     | 2106(1)                                                       | 2575.1(9)                                                     | 2492(9)                                                       |
| Z                                                                  | 4                                                             | 4                                                             | 4                                                             | 4                                                             |
| D <sub>c</sub> /g cm <sup>-3</sup>                                 | 1.289 g/ cm <sup>-3</sup>                                     | 1.297 g/ cm <sup>-3</sup>                                     | 1.206 g/ cm <sup>-3</sup>                                     | 1.246 g/ cm <sup>-3</sup>                                     |
| F(000)                                                             | 872.00                                                        | 872.00                                                        | 1000.0                                                        | 1000.0                                                        |
| M(MoKα)/cm <sup>-1</sup>                                           | 0.83                                                          | 0.83                                                          | 0.76                                                          | 0.79                                                          |
| Crystal dimensions/nm                                              | 0.45×0.45×0.25                                                | 0.30×0.45×0.25                                                | 0.60×0.40×0.20                                                | 0.20×0.10×0.20                                                |
| Scan mode                                                          | ω-2θ                                                          | ω-2θ                                                          | ω-2θ                                                          | ω-2θ                                                          |
| Scan rate in ω/°min <sup>-1</sup>                                  | 4.0( up to 5 scans)                                           | 8.0( up to 5 scans)                                           | 4.0( up to 5 scans)                                           | 4.0( up to 5 scans)                                           |
| Scan width/°                                                       | 1.21 + 0.30 tanθ                                              | 1.58 + 0.30 tanθ                                              | 0.89 + 0.30 tanθ                                              | 0.73 + 0.30 tanθ                                              |
| 2θ max/°                                                           | 50.0                                                          | 55.0                                                          | 50.0                                                          | 50.0                                                          |
| Range of induces h; k; l                                           | 0, 13; 0, 20; -14, 13                                         | 0, 17; 0, 14; -18, 0                                          | ±19; 9, 10; -12, -0                                           | -13, 14; 0, 15; 15, -19                                       |
| Reflections collected (unique)                                     | 3735                                                          | 2516                                                          | 4696                                                          | 4390                                                          |
| Reflection observed with I <sub>0</sub> >2σI <sub>0</sub>          | 1866                                                          | 1465                                                          | 3272                                                          | 1453                                                          |
| Number of parameters                                               | 357                                                           | 330                                                           | 449                                                           | 449                                                           |
| R                                                                  | 0.062                                                         | 0.042                                                         | 0.056                                                         | 0.076                                                         |
| R <sub>w</sub>                                                     | 0.146                                                         | 0.099                                                         | 0.109                                                         | 0.149                                                         |

Supplementary Material for New Journal of Chemistry  
This journal is © The Royal Society of Chemistry and  
The Centre National de la Recherche Scientifique, 2004

|                                                  | $(\sigma^2F)^{-1}$ | $(\sigma^2F)^{-1}$ | $(\sigma^2F)^{-1}$ | $(\sigma^2F)^{-1}$ |
|--------------------------------------------------|--------------------|--------------------|--------------------|--------------------|
| w                                                |                    |                    |                    |                    |
| S                                                | 1.44               | 1.08               | 1.31               | 1.07               |
| Max. Shift/Error in final cycle                  | 0.00               | 0.00               | 0.00               | 0.00               |
| Max. peak in final diff. map/e $\text{\AA}^{-3}$ | 0.49               | 0.21               | 0.15               | 0.43               |
| Min. peak in final diff. map/e $\text{\AA}^{-3}$ | -0.62              | -0.18              | -0.14              | -0.42              |

---
